# Supplementary material for: Global medical education partnerships to expand specialty expertise: a case report on building neurology clinical and research capacity
Source: PubMed Central journal article supplement (PMC4531526; doi:10.1186/1478-4491-12-75), 2014-12-30
Supplement: 12960_2014_480_MOESM1_ESM.pdf [file 12960_2014_480_MOESM1_ESM.pdf]

**Applicant Name:**

**Reviewer:**

**--- PLEASE DOUBLE-CLICK SCORING DOMAINS TO ENTER YOUR SCORES ON AN EXCEL FILE---**

1. Significance of the project (25 pts)
2. Relevance to theme of grant (25 pts)
3. Innovation (10 pts)
4. Overall methods (25 pts)
5. Measures and assessments (10 pts)
6. Ethics and human subjects (5 pts)

**SCORE**

**COMMENTS:**

**-- Reviewers please do not score funding recommendation--**

**RECOMMENDATION:**  **fund**       **don't fund**

---

**MEPI Proposal Total Score (Categories 1-6) Benchmarks:**

- 100    highest possible score, no flaws
- 75    strong proposal, needs some modifications
- 50    minimally acceptable proposal, needs major modifications
- 25    weak proposal with multiple flaws
- 0    worst possible score, not fundable
